# Supplementary material for: FARMS: A New Algorithm for Variable Selection
Source: Hindawi journal article supplement (doi:10.1155/2015/319797), 2015-01-01
Supplement: f1 [file 319797.f1.pdf]

## Supplementary Tables

**ST1.** Univariate analysis results for HLAs. Highlighted those results with p-value<=0.1 or q-value<=0.1.

|                 | Global |      |                         |             |         |         | Durban Cohort |      |                         |             |         |         | Peruvian Cohort |      |                         |             |         |         |
|-----------------|--------|------|-------------------------|-------------|---------|---------|---------------|------|-------------------------|-------------|---------|---------|-----------------|------|-------------------------|-------------|---------|---------|
|                 | N      |      | Mean (Std.Dev) Log10 VL |             | P-value | Q-value | N             |      | Mean (Std.Dev) Log10 VL |             | P-value | Q-value | N               |      | Mean (Std.Dev) Log10 VL |             | P-value | Q-value |
|                 | HLA-   | HLA+ | HLA-                    | HLA+        |         |         | HLA-          | HLA+ | HLA-                    | HLA+        |         |         | HLA-            | HLA+ | HLA-                    | HLA+        |         |         |
| <b>HLA.A.01</b> | 797    | 70   | 4,49 (0,88)             | 4,41 (1,05) | 0,5287  | 0,7961  | 574           | 57   | 4,48 (0,93)             | 4,30 (1,10) | 0,2396  | 0,4296  | 223             | 13   | 4,52 (0,73)             | 4,89 (0,64) | 0,0694  | 0,2461  |
| <b>HLA.A.11</b> | 852    | 15   | 4,49 (0,90)             | 4,15 (0,62) | 0,0528  | 0,2951  | 628           | 3    | 4,47 (0,95)             | 4,25 (0,37) | 0,4084  | 0,5618  | 224             | 12   | 4,57 (0,73)             | 4,12 (0,68) | 0,0499  | 0,2274  |
| <b>HLA.A.31</b> | 840    | 27   | 4,48 (0,90)             | 4,70 (0,74) | 0,1379  | 0,5094  | 627           | 4    | 4,46 (0,95)             | 5,39 (0,24) | 0,0025  | 0,0148  | 213             | 23   | 4,54 (0,73)             | 4,58 (0,74) | 0,7767  | 0,5162  |
| <b>HLA.A.68</b> | 669    | 198  | 4,45 (0,89)             | 4,60 (0,90) | 0,0365  | 0,2353  | 469           | 162  | 4,41 (0,95)             | 4,63 (0,92) | 0,0094  | 0,0412  | 200             | 36   | 4,55 (0,72)             | 4,49 (0,79) | 0,6434  | 0,4656  |
| <b>HLA.A.74</b> | 796    | 71   | 4,52 (0,87)             | 4,10 (1,08) | 0,0019  | 0,0211  | 562           | 69   | 4,51 (0,92)             | 4,08 (1,09) | 0,0023  | 0,0148  | 234             | 2    | 4,54 (0,73)             | 4,58 (1,12) | 0,9724  | 0,5598  |
| <b>HLA.B.08</b> | 783    | 84   | 4,48 (0,90)             | 4,60 (0,85) | 0,2198  | 0,5664  | 554           | 77   | 4,46 (0,96)             | 4,54 (0,86) | 0,4038  | 0,5618  | 229             | 7    | 4,52 (0,73)             | 5,16 (0,25) | 0,0001  | 0,0022  |
| <b>HLA.B.13</b> | 837    | 30   | 4,50 (0,89)             | 4,21 (0,97) | 0,1201  | 0,5094  | 604           | 27   | 4,48 (0,95)             | 4,13 (0,97) | 0,0767  | 0,2458  | 233             | 3    | 4,54 (0,73)             | 4,93 (0,63) | 0,3888  | 0,4656  |
| <b>HLA.B.15</b> | 589    | 278  | 4,44 (0,90)             | 4,58 (0,89) | 0,0386  | 0,2353  | 398           | 233  | 4,37 (0,95)             | 4,63 (0,93) | 0,0010  | 0,0098  | 191             | 45   | 4,59 (0,75)             | 4,33 (0,62) | 0,0146  | 0,1162  |
| <b>HLA.B.18</b> | 818    | 49   | 4,47 (0,90)             | 4,83 (0,69) | 0,0008  | 0,0115  | 597           | 34   | 4,44 (0,95)             | 4,95 (0,72) | 0,0003  | 0,0050  | 221             | 15   | 4,54 (0,74)             | 4,57 (0,56) | 0,8750  | 0,5267  |
| <b>HLA.B.35</b> | 741    | 126  | 4,45 (0,92)             | 4,72 (0,72) | 0,0003  | 0,0061  | 604           | 27   | 4,46 (0,95)             | 4,61 (0,91) | 0,3915  | 0,5618  | 137             | 99   | 4,40 (0,75)             | 4,74 (0,66) | 0,0002  | 0,0023  |
| <b>HLA.B.39</b> | 777    | 90   | 4,50 (0,90)             | 4,37 (0,83) | 0,1498  | 0,5094  | 600           | 31   | 4,49 (0,94)             | 4,10 (1,02) | 0,0480  | 0,1921  | 177             | 59   | 4,56 (0,74)             | 4,50 (0,69) | 0,6285  | 0,4656  |
| <b>HLA.B.42</b> | 724    | 143  | 4,51 (0,90)             | 4,38 (0,87) | 0,1257  | 0,5094  | 492           | 139  | 4,49 (0,97)             | 4,39 (0,89) | 0,2524  | 0,4331  | 232             | 4    | 4,55 (0,73)             | 4,22 (0,18) | 0,0241  | 0,1282  |
| <b>HLA.B.49</b> | 849    | 18   | 4,48 (0,89)             | 4,63 (1,10) | 0,5828  | 0,8308  | 622           | 9    | 4,46 (0,95)             | 5,14 (0,95) | 0,0638  | 0,2358  | 227             | 9    | 4,56 (0,71)             | 4,12 (1,03) | 0,2388  | 0,4481  |
| <b>HLA.B.57</b> | 820    | 47   | 4,52 (0,88)             | 3,88 (0,93) | 0,0000  | 0,0019  | 592           | 39   | 4,51 (0,94)             | 3,85 (0,95) | 0,0001  | 0,0036  | 228             | 8    | 4,56 (0,72)             | 4,02 (0,90) | 0,1376  | 0,3658  |
| <b>HLA.B.81</b> | 796    | 71   | 4,52 (0,87)             | 4,08 (1,05) | 0,0009  | 0,0115  | 561           | 70   | 4,51 (0,93)             | 4,09 (1,05) | 0,0017  | 0,0139  | 235             | 1    | 4,55 (0,73)             | 3,57 (0)    |         |         |
| <b>HLA.C.04</b> | 650    | 217  | 4,48 (0,91)             | 4,52 (0,84) | 0,5137  | 0,7961  | 502           | 129  | 4,50 (0,96)             | 4,35 (0,92) | 0,1179  | 0,3148  | 148             | 88   | 4,41 (0,75)             | 4,77 (0,63) | 0,0001  | 0,0022  |
| <b>HLA.C.05</b> | 842    | 25   | 4,48 (0,90)             | 4,75 (0,90) | 0,1431  | 0,5094  | 622           | 9    | 4,46 (0,94)             | 5,21 (1,07) | 0,0693  | 0,2378  | 220             | 16   | 4,55 (0,73)             | 4,50 (0,70) | 0,8033  | 0,5172  |
| <b>HLA.C.06</b> | 658    | 209  | 4,43 (0,88)             | 4,65 (0,93) | 0,0026  | 0,0246  | 437           | 194  | 4,38 (0,94)             | 4,65 (0,95) | 0,0010  | 0,0098  | 221             | 15   | 4,53 (0,73)             | 4,68 (0,67) | 0,4431  | 0,4656  |
| <b>HLA.C.12</b> | 823    | 44   | 4,51 (0,89)             | 4,10 (0,93) | 0,0065  | 0,0542  | 602           | 29   | 4,49 (0,94)             | 3,92 (1,00) | 0,0052  | 0,0251  | 221             | 15   | 4,55 (0,73)             | 4,44 (0,70) | 0,5537  | 0,4656  |
| <b>HLA.C.17</b> | 711    | 156  | 4,50 (0,90)             | 4,43 (0,89) | 0,3991  | 0,7484  | 479           | 152  | 4,48 (0,97)             | 4,44 (0,90) | 0,6628  | 0,6924  | 232             | 4    | 4,55 (0,73)             | 4,22 (0,18) | 0,0241  | 0,1282  |

**ST2.** Univariate analysis results for OLPs. Highlighted those results with p-value<=0.1 or q-value<=0.1.

|                | Global |      |                         |             |         |         | Durban Cohort |      |                         |             |         |         | Peruvian Cohort |      |                         |             |         |         |
|----------------|--------|------|-------------------------|-------------|---------|---------|---------------|------|-------------------------|-------------|---------|---------|-----------------|------|-------------------------|-------------|---------|---------|
|                | N      |      | Mean (Std.Dev) Log10 VL |             | P-value | Q-value | N             |      | Mean (Std.Dev) Log10 VL |             | P-value | Q-value | N               |      | Mean (Std.Dev) Log10 VL |             | P-value | Q-value |
|                | HLA-   | HLA+ | HLA-                    | HLA+        |         |         | HLA-          | HLA+ | HLA-                    | HLA+        |         |         | HLA-            | HLA+ | HLA-                    | HLA+        |         |         |
| <b>OLP.3</b>   | 736    | 131  | 4,54 (0,89)             | 4,20 (0,88) | 0,0001  | 0,0049  | 528           | 103  | 4,52 (0,94)             | 4,17 (0,94) | 0,0006  | 0,0168  | 208             | 28   | 4,57 (0,74)             | 4,32 (0,60) | 0,0510  | 0,5196  |
| <b>OLP.6</b>   | 797    | 70   | 4,53 (0,89)             | 3,98 (0,79) | 0,0000  | 0,0001  | 588           | 43   | 4,51 (0,94)             | 3,87 (0,86) | 0,0000  | 0,0011  | 209             | 27   | 4,59 (0,73)             | 4,14 (0,64) | 0,0017  | 0,0720  |
| <b>OLP.7</b>   | 797    | 70   | 4,53 (0,88)             | 3,94 (0,95) | 0,0000  | 0,0004  | 579           | 52   | 4,52 (0,93)             | 3,83 (0,99) | 0,0000  | 0,0006  | 218             | 18   | 4,57 (0,72)             | 4,26 (0,79) | 0,1265  | 0,6306  |
| <b>OLP.10</b>  | 838    | 29   | 4,49 (0,90)             | 4,28 (0,75) | 0,1375  | 0,3105  | 612           | 19   | 4,47 (0,96)             | 4,37 (0,74) | 0,5713  | 0,5553  | 226             | 10   | 4,56 (0,72)             | 4,10 (0,78) | 0,0978  | 0,6046  |
| <b>OLP.11</b>  | 730    | 137  | 4,52 (0,90)             | 4,33 (0,85) | 0,0208  | 0,1326  | 536           | 95   | 4,49 (0,96)             | 4,33 (0,91) | 0,1179  | 0,3060  | 194             | 42   | 4,59 (0,73)             | 4,33 (0,71) | 0,0379  | 0,5196  |
| <b>OLP.12</b>  | 817    | 50   | 4,50 (0,90)             | 4,28 (0,78) | 0,0587  | 0,2260  | 605           | 26   | 4,47 (0,96)             | 4,28 (0,75) | 0,2151  | 0,3834  | 212             | 24   | 4,57 (0,71)             | 4,28 (0,82) | 0,1020  | 0,6068  |
| <b>OLP.15</b>  | 864    | 3    | 4,49 (0,90)             | 4,89 (0,23) | 0,0896  | 0,2603  | 628           | 3    | 4,46 (0,95)             | 4,89 (0,23) | 0,0780  | 0,2500  | 236             | 0    | 4,54 (0,73)             | 0 (0)       | NA      | NA      |
| <b>OLP.18</b>  | 849    | 18   | 4,50 (0,89)             | 4,09 (0,87) | 0,0653  | 0,2316  | 620           | 11   | 4,48 (0,95)             | 3,92 (0,90) | 0,0700  | 0,2383  | 229             | 7    | 4,55 (0,73)             | 4,34 (0,83) | 0,5406  | 0,9047  |
| <b>OLP.19</b>  | 816    | 51   | 4,50 (0,89)             | 4,24 (0,95) | 0,0580  | 0,2260  | 603           | 28   | 4,48 (0,95)             | 4,17 (0,97) | 0,1143  | 0,3030  | 213             | 23   | 4,57 (0,70)             | 4,31 (0,94) | 0,2233  | 0,7487  |
| <b>OLP.21</b>  | 786    | 81   | 4,50 (0,90)             | 4,33 (0,88) | 0,0925  | 0,2603  | 558           | 73   | 4,48 (0,96)             | 4,34 (0,90) | 0,2100  | 0,3814  | 228             | 8    | 4,55 (0,73)             | 4,23 (0,65) | 0,2070  | 0,7487  |
| <b>OLP.22</b>  | 815    | 52   | 4,52 (0,89)             | 3,96 (0,90) | 0,0001  | 0,0049  | 590           | 41   | 4,51 (0,94)             | 3,82 (0,92) | 0,0000  | 0,0011  | 225             | 11   | 4,54 (0,74)             | 4,51 (0,63) | 0,8462  | 0,9459  |
| <b>OLP.23</b>  | 813    | 54   | 4,51 (0,89)             | 4,16 (0,86) | 0,0054  | 0,0631  | 592           | 39   | 4,49 (0,95)             | 4,12 (0,95) | 0,0246  | 0,1341  | 221             | 15   | 4,56 (0,74)             | 4,26 (0,55) | 0,0607  | 0,5196  |
| <b>OLP.24</b>  | 786    | 81   | 4,51 (0,90)             | 4,31 (0,89) | 0,0599  | 0,2260  | 554           | 77   | 4,49 (0,96)             | 4,31 (0,88) | 0,1127  | 0,3030  | 232             | 4    | 4,55 (0,72)             | 4,20 (1,11) | 0,5768  | 0,9047  |
| <b>OLP.25</b>  | 675    | 192  | 4,55 (0,88)             | 4,27 (0,94) | 0,0003  | 0,0114  | 453           | 178  | 4,55 (0,94)             | 4,26 (0,94) | 0,0008  | 0,0194  | 222             | 14   | 4,55 (0,72)             | 4,36 (0,85) | 0,4235  | 0,9008  |
| <b>OLP.26</b>  | 834    | 33   | 4,50 (0,89)             | 4,07 (0,92) | 0,0113  | 0,1004  | 617           | 14   | 4,48 (0,95)             | 3,79 (0,85) | 0,0096  | 0,0737  | 217             | 19   | 4,57 (0,71)             | 4,27 (0,94) | 0,1964  | 0,7487  |
| <b>OLP.27</b>  | 812    | 55   | 4,51 (0,90)             | 4,21 (0,78) | 0,0085  | 0,0807  | 603           | 28   | 4,49 (0,95)             | 3,93 (0,84) | 0,0018  | 0,0326  | 209             | 27   | 4,55 (0,74)             | 4,49 (0,61) | 0,6488  | 0,9047  |
| <b>OLP.29</b>  | 789    | 78   | 4,51 (0,90)             | 4,25 (0,87) | 0,0149  | 0,1106  | 575           | 56   | 4,50 (0,95)             | 4,13 (0,87) | 0,0039  | 0,0475  | 214             | 22   | 4,54 (0,72)             | 4,56 (0,84) | 0,9413  | 0,9508  |
| <b>OLP.30</b>  | 815    | 52   | 4,50 (0,90)             | 4,29 (0,83) | 0,0912  | 0,2603  | 590           | 41   | 4,48 (0,95)             | 4,20 (0,88) | 0,0531  | 0,2031  | 225             | 11   | 4,54 (0,74)             | 4,65 (0,48) | 0,4945  | 0,9047  |
| <b>OLP.31</b>  | 854    | 13   | 4,50 (0,89)             | 3,70 (0,78) | 0,0031  | 0,0509  | 622           | 9    | 4,48 (0,95)             | 3,75 (0,75) | 0,0190  | 0,1151  | 232             | 4    | 4,56 (0,72)             | 3,58 (0,97) | 0,1373  | 0,6705  |
| <b>OLP.33</b>  | 791    | 76   | 4,52 (0,88)             | 4,11 (1,00) | 0,0008  | 0,0259  | 563           | 68   | 4,51 (0,93)             | 4,10 (1,05) | 0,0026  | 0,0397  | 228             | 8    | 4,55 (0,74)             | 4,24 (0,41) | 0,0714  | 0,5679  |
| <b>OLP.34</b>  | 811    | 56   | 4,51 (0,88)             | 4,11 (1,00) | 0,0043  | 0,0628  | 584           | 47   | 4,49 (0,94)             | 4,16 (1,05) | 0,0417  | 0,1749  | 227             | 9    | 4,57 (0,72)             | 3,81 (0,70) | 0,0117  | 0,2758  |
| <b>OLP.37</b>  | 773    | 94   | 4,53 (0,89)             | 4,14 (0,90) | 0,0001  | 0,0059  | 556           | 75   | 4,52 (0,94)             | 4,10 (0,95) | 0,0006  | 0,0168  | 217             | 19   | 4,57 (0,73)             | 4,28 (0,66) | 0,0928  | 0,6046  |
| <b>OLP.39</b>  | 856    | 11   | 4,49 (0,90)             | 4,24 (0,89) | 0,3801  | 0,4578  | 626           | 5    | 4,47 (0,95)             | 3,52 (0,59) | 0,0218  | 0,1286  | 230             | 6    | 4,54 (0,73)             | 4,84 (0,61) | 0,2756  | 0,8203  |
| <b>OLP.41</b>  | 677    | 190  | 4,54 (0,89)             | 4,30 (0,90) | 0,0015  | 0,0340  | 480           | 151  | 4,53 (0,95)             | 4,26 (0,93) | 0,0023  | 0,0393  | 197             | 39   | 4,56 (0,73)             | 4,46 (0,73) | 0,4465  | 0,9016  |
| <b>OLP.42</b>  | 808    | 59   | 4,50 (0,90)             | 4,28 (0,76) | 0,0366  | 0,1895  | 601           | 30   | 4,49 (0,95)             | 4,08 (0,77) | 0,0089  | 0,0726  | 207             | 29   | 4,55 (0,73)             | 4,49 (0,70) | 0,6593  | 0,9061  |
| <b>OLP.43</b>  | 830    | 37   | 4,50 (0,90)             | 4,25 (0,83) | 0,0874  | 0,2603  | 608           | 23   | 4,48 (0,95)             | 4,13 (0,92) | 0,0904  | 0,2649  | 222             | 14   | 4,55 (0,74)             | 4,45 (0,61) | 0,5846  | 0,9047  |
| <b>OLP.45</b>  | 835    | 32   | 4,49 (0,90)             | 4,54 (0,79) | 0,7184  | 0,5624  | 606           | 25   | 4,47 (0,95)             | 4,48 (0,88) | 0,9171  | 0,6538  | 229             | 7    | 4,54 (0,74)             | 4,73 (0,21) | 0,0656  | 0,5477  |
| <b>OLP.46</b>  | 831    | 36   | 4,49 (0,90)             | 4,43 (0,82) | 0,6592  | 0,5417  | 606           | 25   | 4,47 (0,95)             | 4,27 (0,91) | 0,2785  | 0,4215  | 225             | 11   | 4,53 (0,74)             | 4,79 (0,40) | 0,0678  | 0,5520  |
| <b>OLP.48</b>  | 825    | 42   | 4,50 (0,90)             | 4,22 (0,86) | 0,0471  | 0,2124  | 594           | 37   | 4,48 (0,95)             | 4,25 (0,90) | 0,1338  | 0,3316  | 231             | 5    | 4,55 (0,73)             | 4,05 (0,48) | 0,0757  | 0,5693  |
| <b>OLP.51</b>  | 857    | 10   | 4,49 (0,90)             | 4,38 (0,64) | 0,6021  | 0,5243  | 627           | 4    | 4,47 (0,95)             | 4,01 (0,35) | 0,0741  | 0,2448  | 230             | 6    | 4,54 (0,73)             | 4,62 (0,70) | 0,7889  | 0,9443  |
| <b>OLP.55</b>  | 828    | 39   | 4,51 (0,89)             | 4,08 (0,99) | 0,0130  | 0,1099  | 603           | 28   | 4,49 (0,94)             | 4,00 (1,00) | 0,0175  | 0,1092  | 225             | 11   | 4,56 (0,71)             | 4,29 (1,00) | 0,4087  | 0,8771  |
| <b>OLP.56</b>  | 859    | 8    | 4,49 (0,90)             | 4,23 (0,46) | 0,1606  | 0,3268  | 628           | 3    | 4,47 (0,95)             | 4,38 (0,69) | 0,8560  | 0,6501  | 231             | 5    | 4,55 (0,73)             | 4,14 (0,33) | 0,0450  | 0,5196  |
| <b>OLP.59</b>  | 807    | 60   | 4,50 (0,90)             | 4,30 (0,79) | 0,0630  | 0,2265  | 604           | 27   | 4,49 (0,95)             | 4,01 (0,86) | 0,0090  | 0,0726  | 203             | 33   | 4,54 (0,74)             | 4,54 (0,65) | 0,9510  | 0,9508  |
| <b>OLP.60</b>  | 847    | 20   | 4,50 (0,89)             | 3,92 (0,80) | 0,0049  | 0,0631  | 619           | 12   | 4,48 (0,95)             | 3,80 (0,89) | 0,0243  | 0,1341  | 228             | 8    | 4,56 (0,73)             | 4,10 (0,67) | 0,0966  | 0,6046  |
| <b>OLP.63</b>  | 856    | 11   | 4,50 (0,89)             | 3,77 (0,69) | 0,0061  | 0,0631  | 622           | 9    | 4,48 (0,95)             | 3,68 (0,74) | 0,0120  | 0,0796  | 234             | 2    | 4,55 (0,73)             | 4,19 (0,00) | 0,0000  | 0,0000  |
| <b>OLP.159</b> | 856    | 11   | 4,49 (0,89)             | 4,26 (1,18) | 0,5342  | 0,5087  | 630           | 1    | 4,46 (0,95)             | 6,93 (0)    | NA      | NA      | 226             | 10   | 4,57 (0,72)             | 3,99 (0,82) | 0,0554  | 0,5196  |
| <b>OLP.160</b> | 857    | 10   | 4,49 (0,89)             | 4,58 (1,31) | 0,8351  | 0,5893  | 626           | 5    | 4,46 (0,95)             | 5,46 (0,96) | 0,0789  | 0,2500  | 231             | 5    | 4,56 (0,72)             | 3,69 (0,98) | 0,1160  | 0,6068  |

|         |     |     |             |             |        |        |     |     |             |             |        |        |     |    |             |             |        |        |
|---------|-----|-----|-------------|-------------|--------|--------|-----|-----|-------------|-------------|--------|--------|-----|----|-------------|-------------|--------|--------|
| OLP.163 | 760 | 107 | 4,52 (0,91) | 4,27 (0,78) | 0,0030 | 0,0509 | 563 | 68  | 4,49 (0,96) | 4,25 (0,85) | 0,0296 | 0,1538 | 197 | 39 | 4,59 (0,74) | 4,31 (0,62) | 0,0174 | 0,3324 |
| OLP.165 | 862 | 5   | 4,49 (0,90) | 4,48 (0,78) | 0,9895 | 0,6328 | 629 | 2   | 4,46 (0,95) | 5,23 (0,19) | 0,0882 | 0,2649 | 233 | 3  | 4,55 (0,73) | 3,99 (0,52) | 0,2006 | 0,7487 |
| OLP.167 | 858 | 9   | 4,48 (0,90) | 4,80 (0,71) | 0,2195 | 0,3896 | 627 | 4   | 4,46 (0,95) | 4,69 (1,07) | 0,6987 | 0,5899 | 231 | 5  | 4,54 (0,73) | 4,89 (0,36) | 0,0913 | 0,6046 |
| OLP.169 | 858 | 9   | 4,48 (0,90) | 4,76 (0,40) | 0,0722 | 0,2389 | 630 | 1   | 4,47 (0,95) | 4,63 (0)    | NA     | NA     | 228 | 8  | 4,53 (0,74) | 4,78 (0,42) | 0,1562 | 0,6863 |
| OLP.174 | 842 | 25  | 4,48 (0,90) | 4,71 (0,64) | 0,0944 | 0,2603 | 620 | 11  | 4,46 (0,95) | 4,83 (0,82) | 0,1645 | 0,3483 | 222 | 14 | 4,54 (0,74) | 4,61 (0,45) | 0,6010 | 0,9047 |
| OLP.176 | 850 | 17  | 4,48 (0,90) | 4,74 (0,48) | 0,0455 | 0,2101 | 628 | 3   | 4,46 (0,95) | 5,02 (0,73) | 0,3211 | 0,4386 | 222 | 14 | 4,53 (0,74) | 4,68 (0,43) | 0,2466 | 0,7557 |
| OLP.178 | 843 | 24  | 4,47 (0,89) | 5,09 (0,82) | 0,0012 | 0,0333 | 615 | 16  | 4,45 (0,94) | 5,21 (0,89) | 0,0037 | 0,0475 | 228 | 8  | 4,53 (0,73) | 4,86 (0,66) | 0,2091 | 0,7487 |
| OLP.179 | 861 | 6   | 4,49 (0,90) | 4,59 (0,52) | 0,6389 | 0,5354 | 629 | 2   | 4,47 (0,95) | 4,28 (0,04) | 0,0017 | 0,0326 | 232 | 4  | 4,54 (0,73) | 4,75 (0,60) | 0,5276 | 0,9047 |
| OLP.180 | 834 | 33  | 4,48 (0,90) | 4,77 (0,67) | 0,0200 | 0,1305 | 609 | 22  | 4,46 (0,96) | 4,77 (0,65) | 0,0398 | 0,1749 | 225 | 11 | 4,53 (0,73) | 4,77 (0,74) | 0,3128 | 0,8429 |
| OLP.181 | 844 | 23  | 4,49 (0,89) | 4,35 (0,97) | 0,4914 | 0,4968 | 620 | 11  | 4,48 (0,95) | 3,76 (1,00) | 0,0396 | 0,1749 | 224 | 12 | 4,52 (0,74) | 4,89 (0,54) | 0,0464 | 0,5196 |
| OLP.182 | 839 | 28  | 4,48 (0,90) | 4,67 (0,55) | 0,0984 | 0,2684 | 623 | 8   | 4,47 (0,95) | 4,49 (0,65) | 0,9112 | 0,6538 | 216 | 20 | 4,53 (0,75) | 4,73 (0,50) | 0,1019 | 0,6068 |
| OLP.183 | 826 | 41  | 4,48 (0,91) | 4,67 (0,63) | 0,0765 | 0,2485 | 613 | 18  | 4,45 (0,96) | 4,90 (0,60) | 0,0066 | 0,0597 | 213 | 23 | 4,55 (0,74) | 4,48 (0,60) | 0,6252 | 0,9047 |
| OLP.187 | 780 | 87  | 4,47 (0,91) | 4,65 (0,75) | 0,0357 | 0,1885 | 571 | 60  | 4,44 (0,97) | 4,67 (0,77) | 0,0397 | 0,1749 | 209 | 27 | 4,53 (0,73) | 4,62 (0,72) | 0,5732 | 0,9047 |
| OLP.188 | 853 | 14  | 4,48 (0,90) | 5,02 (0,61) | 0,0058 | 0,0631 | 623 | 8   | 4,46 (0,95) | 5,10 (0,77) | 0,0514 | 0,1999 | 230 | 6  | 4,53 (0,73) | 4,92 (0,37) | 0,0477 | 0,5196 |
| OLP.190 | 764 | 103 | 4,46 (0,90) | 4,69 (0,81) | 0,0101 | 0,0932 | 566 | 65  | 4,43 (0,95) | 4,76 (0,88) | 0,0060 | 0,0597 | 198 | 38 | 4,54 (0,74) | 4,56 (0,66) | 0,8943 | 0,9459 |
| OLP.191 | 849 | 18  | 4,48 (0,90) | 4,73 (0,52) | 0,0623 | 0,2265 | 620 | 11  | 4,46 (0,95) | 4,89 (0,60) | 0,0411 | 0,1749 | 229 | 7  | 4,54 (0,74) | 4,49 (0,25) | 0,6233 | 0,9047 |
| OLP.194 | 839 | 28  | 4,49 (0,90) | 4,28 (0,74) | 0,1476 | 0,3215 | 620 | 11  | 4,47 (0,95) | 3,99 (0,85) | 0,0911 | 0,2649 | 219 | 17 | 4,55 (0,74) | 4,47 (0,61) | 0,6131 | 0,9047 |
| OLP.195 | 860 | 7   | 4,49 (0,90) | 4,23 (0,84) | 0,4523 | 0,4902 | 629 | 2   | 4,46 (0,95) | 5,35 (0,36) | 0,1719 | 0,3517 | 231 | 5  | 4,56 (0,73) | 3,79 (0,40) | 0,0108 | 0,2758 |
| OLP.199 | 847 | 20  | 4,49 (0,90) | 4,16 (0,72) | 0,0565 | 0,2260 | 623 | 8   | 4,48 (0,95) | 3,71 (0,80) | 0,0290 | 0,1538 | 224 | 12 | 4,55 (0,74) | 4,47 (0,50) | 0,6025 | 0,9047 |
| OLP.203 | 832 | 35  | 4,50 (0,89) | 4,22 (0,98) | 0,1079 | 0,2728 | 598 | 33  | 4,48 (0,95) | 4,19 (1,00) | 0,1102 | 0,3030 | 234 | 2  | 4,54 (0,73) | 4,74 (0,06) | 0,0189 | 0,3324 |
| OLP.206 | 860 | 7   | 4,49 (0,90) | 4,50 (0,42) | 0,9216 | 0,6132 | 629 | 2   | 4,47 (0,95) | 4,74 (0,00) | 0,0000 | 0,0000 | 231 | 5  | 4,55 (0,73) | 4,41 (0,47) | 0,5585 | 0,9047 |
| OLP.212 | 821 | 46  | 4,48 (0,90) | 4,68 (0,71) | 0,0664 | 0,2323 | 603 | 28  | 4,45 (0,95) | 4,78 (0,82) | 0,0512 | 0,1999 | 218 | 18 | 4,54 (0,75) | 4,54 (0,50) | 0,9655 | 0,9508 |
| OLP.216 | 796 | 71  | 4,51 (0,89) | 4,22 (0,94) | 0,0135 | 0,1099 | 581 | 50  | 4,50 (0,94) | 4,08 (1,00) | 0,0065 | 0,0597 | 215 | 21 | 4,54 (0,74) | 4,54 (0,69) | 0,9774 | 0,9508 |
| OLP.220 | 849 | 18  | 4,50 (0,89) | 4,01 (0,90) | 0,0348 | 0,1880 | 617 | 14  | 4,48 (0,95) | 3,99 (1,02) | 0,1012 | 0,2865 | 232 | 4  | 4,55 (0,73) | 4,05 (0,35) | 0,0581 | 0,5196 |
| OLP.224 | 726 | 141 | 4,46 (0,90) | 4,63 (0,88) | 0,0427 | 0,2088 | 506 | 125 | 4,42 (0,96) | 4,66 (0,88) | 0,0074 | 0,0646 | 220 | 16 | 4,56 (0,72) | 4,36 (0,89) | 0,3965 | 0,8771 |
| OLP.226 | 845 | 22  | 4,50 (0,90) | 4,13 (0,87) | 0,0609 | 0,2260 | 617 | 14  | 4,48 (0,95) | 4,01 (1,00) | 0,1045 | 0,2920 | 228 | 8  | 4,55 (0,73) | 4,33 (0,60) | 0,3376 | 0,8504 |
| OLP.228 | 848 | 19  | 4,48 (0,90) | 4,93 (0,77) | 0,0198 | 0,1305 | 618 | 13  | 4,46 (0,95) | 4,98 (0,82) | 0,0413 | 0,1749 | 230 | 6  | 4,54 (0,73) | 4,84 (0,73) | 0,3533 | 0,8613 |
| OLP.236 | 843 | 24  | 4,48 (0,89) | 4,85 (0,91) | 0,0560 | 0,2260 | 615 | 16  | 4,46 (0,95) | 4,85 (1,03) | 0,1484 | 0,3483 | 228 | 8  | 4,53 (0,73) | 4,86 (0,67) | 0,2129 | 0,7487 |
| OLP.237 | 859 | 8   | 4,48 (0,90) | 4,80 (0,77) | 0,2853 | 0,4141 | 630 | 1   | 4,47 (0,95) | 3,18 (0)    | NA     | NA     | 229 | 7  | 4,53 (0,73) | 5,03 (0,43) | 0,0212 | 0,3545 |
| OLP.238 | 857 | 10  | 4,48 (0,90) | 5,09 (0,73) | 0,0281 | 0,1625 | 622 | 9   | 4,46 (0,95) | 5,13 (0,76) | 0,0305 | 0,1544 | 235 | 1  | 4,54 (0,73) | 4,72 (0)    | NA     | NA     |
| OLP.239 | 856 | 11  | 4,48 (0,90) | 4,99 (0,48) | 0,0053 | 0,0631 | 628 | 3   | 4,46 (0,95) | 5,55 (0,05) | 0,0000 | 0,0000 | 228 | 8  | 4,53 (0,74) | 4,79 (0,39) | 0,1164 | 0,6068 |
| OLP.240 | 860 | 7   | 4,48 (0,90) | 5,00 (0,27) | 0,0015 | 0,0340 | 630 | 1   | 4,47 (0,95) | 4,74 (0)    | NA     | NA     | 230 | 6  | 4,53 (0,73) | 5,05 (0,26) | 0,0028 | 0,0935 |
| OLP.243 | 852 | 15  | 4,49 (0,90) | 4,17 (0,78) | 0,1371 | 0,3105 | 628 | 3   | 4,47 (0,95) | 3,36 (0,24) | 0,0103 | 0,0737 | 224 | 12 | 4,55 (0,73) | 4,38 (0,73) | 0,4354 | 0,9016 |
| OLP.250 | 835 | 32  | 4,48 (0,90) | 4,67 (0,73) | 0,1526 | 0,3215 | 620 | 11  | 4,46 (0,95) | 5,05 (0,91) | 0,0564 | 0,2083 | 215 | 21 | 4,55 (0,75) | 4,48 (0,55) | 0,5957 | 0,9047 |
| OLP.253 | 815 | 52  | 4,47 (0,89) | 4,75 (0,91) | 0,0382 | 0,1935 | 590 | 41  | 4,44 (0,95) | 4,87 (0,94) | 0,0066 | 0,0597 | 225 | 11 | 4,56 (0,73) | 4,29 (0,64) | 0,2034 | 0,7487 |
| OLP.259 | 829 | 38  | 4,48 (0,91) | 4,66 (0,58) | 0,0791 | 0,2485 | 612 | 19  | 4,46 (0,96) | 4,82 (0,47) | 0,0037 | 0,0475 | 217 | 19 | 4,55 (0,74) | 4,49 (0,65) | 0,7229 | 0,9181 |
| OLP.260 | 859 | 8   | 4,48 (0,90) | 5,06 (0,68) | 0,0457 | 0,2101 | 627 | 4   | 4,46 (0,95) | 5,20 (0,77) | 0,1527 | 0,3483 | 232 | 4  | 4,54 (0,73) | 4,93 (0,65) | 0,3153 | 0,8429 |
| OLP.264 | 846 | 21  | 4,49 (0,90) | 4,26 (0,78) | 0,1852 | 0,3536 | 622 | 9   | 4,47 (0,95) | 3,88 (0,54) | 0,0112 | 0,0763 | 224 | 12 | 4,54 (0,73) | 4,54 (0,83) | 0,9853 | 0,9508 |
| OLP.265 | 768 | 99  | 4,46 (0,90) | 4,69 (0,86) | 0,0169 | 0,1196 | 541 | 90  | 4,43 (0,96) | 4,69 (0,89) | 0,0101 | 0,0737 | 227 | 9  | 4,54 (0,74) | 4,60 (0,62) | 0,8009 | 0,9459 |
| OLP.271 | 850 | 17  | 4,49 (0,90) | 4,33 (0,72) | 0,3965 | 0,4637 | 627 | 4   | 4,46 (0,95) | 4,90 (0,62) | 0,2510 | 0,4075 | 223 | 13 | 4,57 (0,73) | 4,16 (0,68) | 0,0575 | 0,5196 |
| OLP.272 | 862 | 5   | 4,49 (0,90) | 4,72 (0,88) | 0,5801 | 0,5152 | 628 | 3   | 4,46 (0,95) | 5,30 (0,41) | 0,0689 | 0,2383 | 234 | 2  | 4,55 (0,73) | 3,86 (0,54) | 0,3225 | 0,8429 |
| OLP.277 | 861 | 6   | 4,49 (0,90) | 4,78 (0,59) | 0,2812 | 0,4141 | 627 | 4   | 4,46 (0,95) | 4,98 (0,39) | 0,0738 | 0,2448 | 234 | 2  | 4,54 (0,73) | 4,36 (0,87) | 0,8180 | 0,9459 |

|         |     |     |             |             |        |        |     |     |             |             |        |        |     |    |             |             |        |        |
|---------|-----|-----|-------------|-------------|--------|--------|-----|-----|-------------|-------------|--------|--------|-----|----|-------------|-------------|--------|--------|
| OLP.402 | 862 | 5   | 4,49 (0,90) | 4,74 (0,15) | 0,0146 | 0,1106 | 630 | 1   | 4,47 (0,95) | 4,73 (0)    | NA     | NA     | 232 | 4  | 4,54 (0,74) | 4,75 (0,18) | 0,0912 | 0,6046 |
| OLP.405 | 860 | 7   | 4,49 (0,90) | 4,06 (0,79) | 0,1975 | 0,3659 | 630 | 1   | 4,47 (0,95) | 5,04 (0)    | NA     | NA     | 230 | 6  | 4,56 (0,72) | 3,89 (0,72) | 0,0740 | 0,5693 |
| OLP.406 | 857 | 10  | 4,49 (0,90) | 4,23 (0,71) | 0,2828 | 0,4141 | 628 | 3   | 4,46 (0,95) | 4,88 (0,25) | 0,0911 | 0,2649 | 229 | 7  | 4,56 (0,73) | 3,95 (0,66) | 0,0506 | 0,5196 |
| OLP.413 | 849 | 18  | 4,48 (0,90) | 4,74 (0,90) | 0,2545 | 0,4055 | 617 | 14  | 4,46 (0,95) | 4,92 (0,84) | 0,0595 | 0,2163 | 232 | 4  | 4,55 (0,73) | 4,09 (0,94) | 0,3958 | 0,8771 |
| OLP.417 | 863 | 4   | 4,49 (0,89) | 3,53 (0,90) | 0,1215 | 0,2928 | 628 | 3   | 4,47 (0,95) | 3,10 (0,32) | 0,0150 | 0,0963 | 235 | 1  | 4,54 (0,73) | 4,82 (0)    | NA     | NA     |
| OLP.421 | 859 | 8   | 4,48 (0,90) | 5,05 (0,85) | 0,1016 | 0,2700 | 623 | 8   | 4,46 (0,95) | 5,05 (0,85) | 0,0910 | 0,2649 | 236 | 0  | 4,54 (0,73) | 0 (0)       | NA     | NA     |
| OLP.279 | 841 | 26  | 4,48 (0,90) | 4,81 (0,68) | 0,0237 | 0,1441 | 627 | 4   | 4,47 (0,95) | 4,62 (0,40) | 0,4945 | 0,5288 | 214 | 22 | 4,51 (0,73) | 4,84 (0,72) | 0,0539 | 0,5196 |
| OLP.280 | 845 | 22  | 4,48 (0,90) | 4,70 (0,55) | 0,0789 | 0,2485 | 622 | 9   | 4,46 (0,95) | 4,88 (0,56) | 0,0542 | 0,2037 | 223 | 13 | 4,54 (0,74) | 4,58 (0,52) | 0,8196 | 0,9459 |
| OLP.281 | 729 | 138 | 4,50 (0,88) | 4,41 (0,97) | 0,2727 | 0,4061 | 507 | 124 | 4,49 (0,94) | 4,36 (0,99) | 0,1672 | 0,3483 | 222 | 14 | 4,52 (0,73) | 4,83 (0,62) | 0,0961 | 0,6046 |
| OLP.283 | 790 | 77  | 4,46 (0,91) | 4,73 (0,71) | 0,0034 | 0,0525 | 579 | 52  | 4,44 (0,96) | 4,75 (0,81) | 0,0105 | 0,0737 | 211 | 25 | 4,53 (0,76) | 4,67 (0,45) | 0,1930 | 0,7487 |
| OLP.284 | 806 | 61  | 4,47 (0,91) | 4,74 (0,72) | 0,0060 | 0,0631 | 585 | 46  | 4,44 (0,96) | 4,80 (0,78) | 0,0053 | 0,0576 | 221 | 15 | 4,54 (0,75) | 4,59 (0,47) | 0,7153 | 0,9181 |
| OLP.286 | 852 | 15  | 4,49 (0,89) | 4,54 (1,07) | 0,8465 | 0,5915 | 623 | 8   | 4,47 (0,95) | 4,17 (1,29) | 0,5367 | 0,5481 | 229 | 7  | 4,53 (0,73) | 4,96 (0,58) | 0,0976 | 0,6046 |
| OLP.287 | 850 | 17  | 4,49 (0,90) | 4,56 (0,70) | 0,6694 | 0,5445 | 620 | 11  | 4,47 (0,95) | 4,35 (0,73) | 0,5926 | 0,5553 | 230 | 6  | 4,53 (0,73) | 4,96 (0,47) | 0,0767 | 0,5693 |
| OLP.288 | 858 | 9   | 4,48 (0,90) | 5,00 (0,70) | 0,0572 | 0,2260 | 624 | 7   | 4,46 (0,95) | 4,90 (0,72) | 0,1599 | 0,3483 | 234 | 2  | 4,54 (0,73) | 5,37 (0,71) | 0,3437 | 0,8504 |
| OLP.115 | 837 | 30  | 4,48 (0,90) | 4,73 (0,80) | 0,1010 | 0,2700 | 613 | 18  | 4,46 (0,95) | 4,62 (0,95) | 0,4804 | 0,5260 | 224 | 12 | 4,52 (0,74) | 4,89 (0,52) | 0,0359 | 0,5196 |
| OLP.116 | 835 | 32  | 4,47 (0,90) | 4,94 (0,79) | 0,0022 | 0,0460 | 612 | 19  | 4,45 (0,95) | 5,07 (0,72) | 0,0016 | 0,0326 | 223 | 13 | 4,53 (0,72) | 4,75 (0,86) | 0,3788 | 0,8771 |
| OLP.117 | 859 | 8   | 4,49 (0,89) | 4,65 (1,09) | 0,6756 | 0,5462 | 625 | 6   | 4,47 (0,95) | 4,54 (1,27) | 0,8848 | 0,6538 | 234 | 2  | 4,54 (0,73) | 4,98 (0,01) | 0,0000 | 0,0000 |
| OLP.100 | 828 | 39  | 4,47 (0,89) | 4,75 (0,97) | 0,0938 | 0,2603 | 595 | 36  | 4,45 (0,94) | 4,77 (1,00) | 0,0676 | 0,2376 | 233 | 3  | 4,54 (0,73) | 4,46 (0,43) | 0,7784 | 0,9385 |
| OLP.102 | 837 | 30  | 4,48 (0,90) | 4,74 (0,77) | 0,0810 | 0,2513 | 609 | 22  | 4,45 (0,95) | 4,88 (0,85) | 0,0317 | 0,1569 | 228 | 8  | 4,55 (0,74) | 4,36 (0,23) | 0,0604 | 0,5196 |
| OLP.289 | 861 | 6   | 4,49 (0,90) | 4,54 (0,79) | 0,8775 | 0,6050 | 627 | 4   | 4,47 (0,95) | 4,60 (1,01) | 0,8037 | 0,6317 | 234 | 2  | 4,54 (0,73) | 4,41 (0,04) | 0,0394 | 0,5196 |
| OLP.292 | 859 | 8   | 4,48 (0,90) | 4,93 (0,55) | 0,0563 | 0,2260 | 629 | 2   | 4,46 (0,95) | 5,09 (1,11) | 0,5732 | 0,5553 | 230 | 6  | 4,53 (0,74) | 4,87 (0,40) | 0,0937 | 0,6046 |
| OLP.300 | 863 | 4   | 4,48 (0,90) | 5,03 (0,40) | 0,0693 | 0,2387 | 629 | 2   | 4,46 (0,95) | 5,29 (0,44) | 0,2220 | 0,3834 | 234 | 2  | 4,54 (0,73) | 4,76 (0,03) | 0,0001 | 0,0118 |
| OLP.301 | 860 | 7   | 4,48 (0,90) | 4,92 (0,53) | 0,0721 | 0,2389 | 629 | 2   | 4,47 (0,95) | 4,70 (0,24) | 0,3922 | 0,4857 | 231 | 5  | 4,53 (0,73) | 5,02 (0,62) | 0,1547 | 0,6863 |
| OLP.306 | 865 | 2   | 4,49 (0,90) | 4,80 (0,10) | 0,0937 | 0,2603 | 630 | 1   | 4,47 (0,95) | 4,73 (0)    | NA     | NA     | 235 | 1  | 4,54 (0,73) | 4,87 (0)    | NA     | NA     |
| OLP.307 | 864 | 3   | 4,48 (0,90) | 5,15 (0,17) | 0,0151 | 0,1106 | 631 | 0   | 4,47 (0,95) | 0 (0)       | NA     | NA     | 233 | 3  | 4,54 (0,73) | 5,15 (0,17) | 0,0115 | 0,2758 |
| OLP.311 | 860 | 7   | 4,48 (0,90) | 5,24 (0,47) | 0,0048 | 0,0631 | 629 | 2   | 4,46 (0,95) | 5,09 (0,36) | 0,2437 | 0,4024 | 231 | 5  | 4,53 (0,73) | 5,30 (0,53) | 0,0291 | 0,4440 |
| OLP.312 | 861 | 6   | 4,48 (0,90) | 5,22 (0,54) | 0,0197 | 0,1305 | 628 | 3   | 4,46 (0,95) | 5,63 (0,43) | 0,0385 | 0,1749 | 233 | 3  | 4,54 (0,73) | 4,80 (0,13) | 0,0411 | 0,5196 |
| OLP.314 | 840 | 27  | 4,48 (0,90) | 4,85 (0,58) | 0,0029 | 0,0509 | 627 | 4   | 4,47 (0,95) | 4,55 (0,96) | 0,8671 | 0,6501 | 213 | 23 | 4,50 (0,74) | 4,90 (0,50) | 0,0017 | 0,0720 |
| OLP.315 | 849 | 18  | 4,48 (0,90) | 4,86 (0,52) | 0,0068 | 0,0676 | 631 | 0   | 4,47 (0,95) | 0 (0)       | NA     | NA     | 218 | 18 | 4,52 (0,74) | 4,86 (0,52) | 0,0156 | 0,3246 |
| OLP.319 | 863 | 4   | 4,49 (0,90) | 4,91 (0,35) | 0,0937 | 0,2603 | 630 | 1   | 4,47 (0,95) | 4,81 (0)    | NA     | NA     | 233 | 3  | 4,54 (0,73) | 4,94 (0,42) | 0,2375 | 0,7487 |
| OLP.321 | 856 | 11  | 4,48 (0,90) | 4,66 (0,43) | 0,2227 | 0,3896 | 627 | 4   | 4,46 (0,95) | 5,07 (0,31) | 0,0245 | 0,1341 | 229 | 7  | 4,55 (0,74) | 4,42 (0,29) | 0,3169 | 0,8429 |
| OLP.331 | 865 | 2   | 4,49 (0,90) | 4,39 (0,04) | 0,0610 | 0,2260 | 631 | 0   | 4,47 (0,95) | 0 (0)       | NA     | NA     | 234 | 2  | 4,54 (0,73) | 4,39 (0,04) | 0,0124 | 0,2758 |
| OLP.332 | 864 | 3   | 4,49 (0,90) | 4,44 (0,62) | 0,9049 | 0,6103 | 630 | 1   | 4,47 (0,95) | 3,73 (0)    | NA     | NA     | 234 | 2  | 4,54 (0,73) | 4,79 (0,10) | 0,0936 | 0,6046 |
| OLP.335 | 859 | 8   | 4,48 (0,90) | 4,85 (0,50) | 0,0783 | 0,2485 | 626 | 5   | 4,46 (0,95) | 4,95 (0,61) | 0,1495 | 0,3483 | 233 | 3  | 4,54 (0,73) | 4,68 (0,25) | 0,4277 | 0,9016 |
| OLP.343 | 864 | 3   | 4,49 (0,90) | 4,89 (0,22) | 0,0822 | 0,2517 | 630 | 1   | 4,47 (0,95) | 4,92 (0)    | NA     | NA     | 234 | 2  | 4,54 (0,73) | 4,88 (0,32) | 0,3651 | 0,8771 |
| OLP.355 | 862 | 5   | 4,49 (0,90) | 4,50 (1,03) | 0,9736 | 0,6295 | 629 | 2   | 4,47 (0,95) | 3,53 (0,99) | 0,4057 | 0,4883 | 233 | 3  | 4,53 (0,73) | 5,16 (0,16) | 0,0084 | 0,2538 |
| OLP.356 | 862 | 5   | 4,48 (0,90) | 5,07 (0,45) | 0,0438 | 0,2090 | 628 | 3   | 4,46 (0,95) | 4,95 (0,60) | 0,2928 | 0,4342 | 234 | 2  | 4,54 (0,73) | 5,25 (0,05) | 0,0000 | 0,0016 |
| OLP.360 | 859 | 8   | 4,48 (0,90) | 5,16 (0,73) | 0,0332 | 0,1834 | 624 | 7   | 4,46 (0,95) | 5,21 (0,77) | 0,0410 | 0,1749 | 235 | 1  | 4,54 (0,73) | 4,80 (0)    | NA     | NA     |
| OLP.362 | 848 | 19  | 4,48 (0,89) | 4,81 (0,90) | 0,1328 | 0,3105 | 614 | 17  | 4,45 (0,95) | 4,91 (0,89) | 0,0506 | 0,1999 | 234 | 2  | 4,55 (0,73) | 3,92 (0,50) | 0,3178 | 0,8429 |
| OLP.365 | 828 | 39  | 4,46 (0,89) | 5,03 (0,91) | 0,0005 | 0,0165 | 593 | 38  | 4,43 (0,94) | 5,05 (0,91) | 0,0002 | 0,0075 | 235 | 1  | 4,54 (0,73) | 4,19 (0)    | NA     | NA     |
| OLP.371 | 842 | 25  | 4,48 (0,90) | 4,66 (0,79) | 0,2718 | 0,4061 | 613 | 18  | 4,46 (0,95) | 4,81 (0,81) | 0,0836 | 0,2602 | 229 | 7  | 4,55 (0,73) | 4,28 (0,67) | 0,3385 | 0,8504 |
| OLP.378 | 863 | 4   | 4,49 (0,90) | 4,87 (0,23) | 0,0429 | 0,2088 | 631 | 0   | 4,47 (0,95) | 0 (0)       | NA     | NA     | 232 | 4  | 4,54 (0,73) | 4,87 (0,23) | 0,0586 | 0,5196 |

|                |     |     |             |             |        |        |     |     |             |             |        |        |     |    |             |             |        |        |
|----------------|-----|-----|-------------|-------------|--------|--------|-----|-----|-------------|-------------|--------|--------|-----|----|-------------|-------------|--------|--------|
| <b>OLP.381</b> | 863 | 4   | 4,48 (0,90) | 4,97 (0,31) | 0,0508 | 0,2249 | 629 | 2   | 4,46 (0,95) | 5,19 (0,22) | 0,1154 | 0,3030 | 234 | 2  | 4,54 (0,73) | 4,75 (0,22) | 0,3997 | 0,8771 |
| <b>OLP.393</b> | 859 | 8   | 4,48 (0,89) | 5,24 (1,15) | 0,1034 | 0,2701 | 626 | 5   | 4,45 (0,94) | 5,99 (0,57) | 0,0034 | 0,0475 | 233 | 3  | 4,55 (0,73) | 3,99 (0,42) | 0,1433 | 0,6839 |
| <b>OLP.396</b> | 851 | 16  | 4,49 (0,90) | 4,57 (0,77) | 0,6569 | 0,5416 | 623 | 8   | 4,47 (0,95) | 4,24 (0,92) | 0,4994 | 0,5288 | 228 | 8  | 4,53 (0,74) | 4,91 (0,39) | 0,0293 | 0,4440 |
| <b>OLP.397</b> | 843 | 24  | 4,48 (0,90) | 4,75 (0,84) | 0,1376 | 0,3105 | 620 | 11  | 4,46 (0,95) | 5,01 (0,93) | 0,0791 | 0,2500 | 223 | 13 | 4,54 (0,73) | 4,52 (0,70) | 0,9170 | 0,9508 |
| <b>OLP.398</b> | 859 | 8   | 4,49 (0,90) | 4,01 (0,70) | 0,0926 | 0,2603 | 629 | 2   | 4,47 (0,95) | 3,24 (0,91) | 0,3049 | 0,4345 | 230 | 6  | 4,55 (0,73) | 4,26 (0,47) | 0,1945 | 0,7487 |
| <b>OLP.399</b> | 864 | 3   | 4,48 (0,90) | 5,52 (0,24) | 0,0137 | 0,1099 | 630 | 1   | 4,46 (0,95) | 5,51 (0)    | NA     | NA     | 234 | 2  | 4,53 (0,73) | 5,53 (0,34) | 0,1385 | 0,6705 |
| <b>OLP.401</b> | 841 | 26  | 4,48 (0,90) | 4,77 (0,61) | 0,0238 | 0,1441 | 631 | 0   | 4,47 (0,95) | 0 (0)       | NA     | NA     | 210 | 26 | 4,51 (0,74) | 4,77 (0,61) | 0,0540 | 0,5196 |
| <b>OLP.67</b>  | 861 | 6   | 4,48 (0,90) | 4,88 (0,53) | 0,1288 | 0,3044 | 629 | 2   | 4,47 (0,95) | 4,77 (1,11) | 0,7651 | 0,6179 | 232 | 4  | 4,54 (0,73) | 4,93 (0,20) | 0,0184 | 0,3324 |
| <b>OLP.71</b>  | 859 | 8   | 4,48 (0,90) | 4,95 (0,62) | 0,0707 | 0,2389 | 624 | 7   | 4,46 (0,95) | 5,12 (0,42) | 0,0052 | 0,0576 | 235 | 1  | 4,55 (0,73) | 3,76 (0)    | NA     | NA     |
| <b>OLP.76</b>  | 574 | 293 | 4,45 (0,90) | 4,55 (0,89) | 0,1254 | 0,2993 | 414 | 217 | 4,46 (0,96) | 4,48 (0,94) | 0,8664 | 0,6501 | 160 | 76 | 4,43 (0,73) | 4,77 (0,68) | 0,0007 | 0,0370 |
| <b>OLP.79</b>  | 792 | 75  | 4,47 (0,90) | 4,67 (0,84) | 0,0583 | 0,2260 | 592 | 39  | 4,45 (0,96) | 4,70 (0,80) | 0,0664 | 0,2374 | 200 | 36 | 4,53 (0,70) | 4,62 (0,88) | 0,5398 | 0,9047 |
| <b>OLP.83</b>  | 763 | 104 | 4,47 (0,91) | 4,63 (0,81) | 0,0550 | 0,2260 | 577 | 54  | 4,45 (0,95) | 4,60 (0,94) | 0,2689 | 0,4208 | 186 | 50 | 4,51 (0,75) | 4,67 (0,65) | 0,1457 | 0,6855 |
| <b>OLP.84</b>  | 605 | 262 | 4,45 (0,92) | 4,58 (0,82) | 0,0301 | 0,1700 | 432 | 199 | 4,44 (0,98) | 4,53 (0,89) | 0,2309 | 0,3933 | 173 | 63 | 4,47 (0,78) | 4,75 (0,52) | 0,0020 | 0,0724 |
| <b>OLP.85</b>  | 695 | 172 | 4,45 (0,91) | 4,62 (0,84) | 0,0244 | 0,1441 | 512 | 119 | 4,45 (0,95) | 4,54 (0,95) | 0,3211 | 0,4386 | 183 | 53 | 4,47 (0,77) | 4,79 (0,51) | 0,0006 | 0,0370 |
| <b>OLP.89</b>  | 859 | 8   | 4,49 (0,90) | 4,46 (0,83) | 0,9207 | 0,6132 | 629 | 2   | 4,47 (0,95) | 4,69 (0,07) | 0,0433 | 0,1783 | 230 | 6  | 4,55 (0,72) | 4,38 (0,97) | 0,6893 | 0,9084 |
